# Supplementary material for: Geo-locate Project: A novel approach to resolving meteorological station location issues with the assistance of undergraduate students
Source: Copernicus journal article supplement (doi:10.5194/gc-2019-10), 2019-07-02
Supplement: Supplementary file 1 [file gc-2019-10-supplement.zip]

| First name            | Surname    | Academic year |
|-----------------------|------------|---------------|
| HUDAA NOOR-UL         | AHMAD      | 2017/18       |
| GABRIELE              | AJAUSKAITE | 2017/18       |
| DAVID KEVIN           | ANDERSON   | 2017/18       |
| JENNIFER              | ARMSTRONG  | 2017/18       |
| CELINE ALICE          | BEHAN      | 2017/18       |
| ZOE JANE              | BLANCH     | 2017/18       |
| CLAIR MARINA          | BOYLE      | 2017/18       |
| AOIFE MICHELLE        | BRACKEN    | 2017/18       |
| RACHEL EILEEN         | BRADY      | 2017/18       |
| MEGAN MARIE           | BRADY      | 2017/18       |
| SUSAN MAWN            | BRADY      | 2017/18       |
| VIKKI ANN             | BRENNAN    | 2017/18       |
| ELISE MARIE CLAIRE    | BRENNAN    | 2017/18       |
| LAUREN                | BROWNE     | 2017/18       |
| RACHEL FRANCES        | BROWNE     | 2017/18       |
| CORMAC                | BROWNE     | 2017/18       |
| AILIS CATHERINE       | BRUCE      | 2017/18       |
| MARISSA FRANCES       | BRYAN      | 2017/18       |
| MAKSIMS               | BURAKS     | 2017/18       |
| TAMARA                | BYRNE      | 2017/18       |
| EMMA                  | BYRNE      | 2017/18       |
| EOIN JOSEPH           | BYRNE      | 2017/18       |
| CAOILAINN             | BYRNE      | 2017/18       |
| EVAN EDWARD           | BYRNE      | 2017/18       |
| EAMONN GEORGE         | BYRNE      | 2017/18       |
| LAUREN                | CADDEN     | 2017/18       |
| HUGH GERARD           | CAFFERTY   | 2017/18       |
| DAVID CHRISTOPHER     | CALDWELL   | 2017/18       |
| ROISIN                | CAMPBELL   | 2017/18       |
| EIBHLÍN HANNAH        | CANNON     | 2017/18       |
| JAMES PATRICK         | CAREY      | 2017/18       |
| CONOR MICHAEL MULLLEN | CAREY      | 2017/18       |
| JENNIFER ANN          | CARLETON   | 2017/18       |
| EMILY ELIZABETH       | CARRICK    | 2017/18       |
| LAURA ANN             | CARSON     | 2017/18       |
| DEIRDRE NOELLE        | CHAMBERS   | 2017/18       |
| GEMMA LOUISE          | CHEEVERS   | 2017/18       |
| ROSS KARL             | CHERUBINI  | 2017/18       |
| ROBERT                | CLARKE     | 2017/18       |
| AINE MARIE            | COLLINS    | 2017/18       |
| LEANNE MARYSE         | CONATY     | 2017/18       |
| DANIEL                | CONWAY     | 2017/18       |
| JORDAN                | COONEY     | 2017/18       |

|                  |                  |         |
|------------------|------------------|---------|
| SIOBHAN          | COSTELLO         | 2017/18 |
| STACEY           | COUGHLAN         | 2017/18 |
| CHARLOTTE MARIE  | COUNIHAN         | 2017/18 |
| OISIN RUARI      | CRAWLEY          | 2017/18 |
| SARAH ANNE       | CROWE            | 2017/18 |
| AISLING MARIE    | CULLEN           | 2017/18 |
| GRACE            | CULLEN           | 2017/18 |
| TORI MARIE       | CURLEY MC CARTHY | 2017/18 |
| PAUL             | CURRAN           | 2017/18 |
| JAMIE            | CUSSEN           | 2017/18 |
| DOMENIC          | DANCA            | 2017/18 |
| SOPHIE MARIE     | DE COURCEY TOBIN | 2017/18 |
| AISHLING         | DELANEY          | 2017/18 |
| NIALL HENRY      | DEMPSEY          | 2017/18 |
| EMMA             | DEVLIN           | 2017/18 |
| NIALL BRENDAN    | DILLON           | 2017/18 |
| JESSICA CARMEL   | DOHERTY          | 2017/18 |
| SORCHA           | DOLAN            | 2017/18 |
| MONICA MARY      | DONOGHUE         | 2017/18 |
| JAMES OLIVER     | DONOGHUE         | 2017/18 |
| CELINE           | DONOHUE          | 2017/18 |
| KELLY MARIA      | DOOLAN           | 2017/18 |
| HOLLY JUDITH     | DORAN            | 2017/18 |
| LAURIE           | DORE             | 2017/18 |
| PETER            | DOWNEY           | 2017/18 |
| ROISIN CAITLEAIN | DOYLE            | 2017/18 |
| THOMAS JAMES     | DOYLE            | 2017/18 |
| ADRIAN MICHAEL   | DOYLE            | 2017/18 |
| NIAMH            | DOYLE            | 2017/18 |
| AOIFE MAUREEN    | DOYLE            | 2017/18 |
| GREG             | DUFFY            | 2017/18 |
| JACK KEVIN       | DUNNE            | 2017/18 |
| EVAN PATRICK     | DWYER            | 2017/18 |
| LEELLE ANN       | EAKINS           | 2017/18 |
| RYAN DAVID       | EARLEY           | 2017/18 |
| SHAUNA BRIDGET   | EARLIE           | 2017/18 |
| CONAL            | EDMUNDSON        | 2017/18 |
| BEKAH JOY        | EGAN             | 2017/18 |
| SEAMUS           | ENNIS            | 2017/18 |
| JOSEPH PATRICK   | FARRELL          | 2017/18 |
| TRACI            | FARRELL          | 2017/18 |
| CARLA            | FARRELL          | 2017/18 |
| JESSICA          | FERRIS           | 2017/18 |
| BLATHNAID        | FLAHERTY         | 2017/18 |

|                    |                 |         |
|--------------------|-----------------|---------|
| SOPHIE ANN         | FLOODY          | 2017/18 |
| AISLING CATHERINE  | FLYNN CORRIGAN  | 2017/18 |
| LAUREN             | FOLEY           | 2017/18 |
| JOHN               | FURLONG         | 2017/18 |
| MICHAELA PATRICIA  | FYSON-WHITE     | 2017/18 |
| EOIN DEREK         | GADDREN         | 2017/18 |
| ANNA ELIZABETH     | GALLAGHER       | 2017/18 |
| ANGELA NOELEEN     | GALLAGHER       | 2017/18 |
| EMMA MARIE         | GALLEN          | 2017/18 |
| LAURA BRIDGET      | GARRY           | 2017/18 |
| AARON PATRICK      | GERAGHTY        | 2017/18 |
| BRONA              | GORMAN          | 2017/18 |
| ELLEN              | GRAY            | 2017/18 |
| MIREIA             | GUARDINO FERRAN | 2017/18 |
| SARAH LOUISE       | HAMM            | 2017/18 |
| ORLA LOUISE        | HAND            | 2017/18 |
| JAMES PATRICK      | HAWKINS         | 2017/18 |
| NIAMH ANNA         | HEGARTY         | 2017/18 |
| RYAN BRENDAN       | HENRY           | 2017/18 |
| LAURA MARY         | HENRY           | 2017/18 |
| DARREN             | HUDSON          | 2017/18 |
| SHANE              | HYNES           | 2017/18 |
| MEGAN ELISE        | KEHOE HANNIGAN  | 2017/18 |
| SAOIRSE SARAH KATE | KELLY           | 2017/18 |
| NIAMH PATRICIA     | KELLY           | 2017/18 |
| ARAN               | KELLY           | 2017/18 |
| TARA CELINE MARY   | KELLY           | 2017/18 |
| TARA CATHERINE     | KENNY           | 2017/18 |
| CIARA ZITA         | KEOGH           | 2017/18 |
| ELLEN MARY         | KINSELLA        | 2017/18 |
| TARA MARY          | LACEY           | 2017/18 |
| CONOR PIO          | LAVIN           | 2017/18 |
| FIONA              | LENNON          | 2017/18 |
| HANNAH MAY         | LEONARD         | 2017/18 |
| HANNAH KATE        | LONERGAN        | 2017/18 |
| KARL JAMES         | LYNAM           | 2017/18 |
| ROBERT JOHN        | MADDEN          | 2017/18 |
| ADAM JOSEPH        | MAGUIRE         | 2017/18 |
| ADAM GERARD        | MAGUIRE         | 2017/18 |
| AMANDA MARY        | MAHER           | 2017/18 |
| LOUISA MERIEL      | MARKES          | 2017/18 |
| SHAUNA PATRICIA    | MARKEY          | 2017/18 |
| DEAN ANTHONY       | MARTIN          | 2017/18 |
| CONOR PATRICK      | MARTIN          | 2017/18 |

|                      |                    |         |
|----------------------|--------------------|---------|
| LEAH MARGARET        | MASTERSON          | 2017/18 |
| ELAINE               | MC BRIDE           | 2017/18 |
| CHANTELLE            | MC BRIDE           | 2017/18 |
| KEANE                | MC CALL MAHER      | 2017/18 |
| NIAMH                | MC CARTHY          | 2017/18 |
| CORY CHRISTOPHER     | MC CARTHY          | 2017/18 |
| KATE ANN             | MC CAULEY          | 2017/18 |
| EAMONN ASHLEY MARTIN | MC CLEAN           | 2017/18 |
| HANNAH               | MC CORD            | 2017/18 |
| AMY CATHERINE        | MC DONALD          | 2017/18 |
| EVAN DANIEL          | MC ENEANEY         | 2017/18 |
| SEAN PHILIP          | MC GOLDRICK        | 2017/18 |
| SINEAD AINE          | MC GOVERN          | 2017/18 |
| JAMIE MARIE          | MC GRATH           | 2017/18 |
| AINE MARY            | MC GRATH           | 2017/18 |
| DARRAGH              | MC GUINNESS        | 2017/18 |
| LAUREN NOELLE        | MC KENNA           | 2017/18 |
| EIRIN MOYA           | MC KERNAN          | 2017/18 |
| ERIN SASKIA          | MC LOUGHLIN        | 2017/18 |
| PATRICK JOHN         | MC LOUGHLIN        | 2017/18 |
| NIAMH                | MC NALLY           | 2017/18 |
| SHONA                | MC NICHOLAS        | 2017/18 |
| MOLLY                | MC WEENEY          | 2017/18 |
| DEAN                 | MENTON             | 2017/18 |
| MELANIE SARAH LOUISE | MIDDLETON          | 2017/18 |
| KATIE ANN            | MONAGHAN           | 2017/18 |
| ASHLING CIARA        | MONAGHAN           | 2017/18 |
| EVAN CHRISTOPHER     | MORGAN             | 2017/18 |
| DYLAN FRANCIS        | MORRIS             | 2017/18 |
| PIERCE EAMONN        | MULHOLLAND         | 2017/18 |
| AINE RIOANA          | MULLIGAN           | 2017/18 |
| GRACE                | MULLIGAN           | 2017/18 |
| AOIFE MARIE          | MURPHY             | 2017/18 |
| CLAUDIA MARY         | MURTAGH            | 2017/18 |
| THERESE ALEKSANDRA   | MYSLINSKI          | 2017/18 |
| JULIAN               | NAGI               | 2017/18 |
| OISIN TOMAS          | Ó BRIAIN           | 2017/18 |
| ISOBEL JANE          | O'BEIRNE MORRISSEY | 2017/18 |
| JAMES PATRICK        | O'BRIEN            | 2017/18 |
| CIARA LOUISE         | O'BRIEN            | 2017/18 |
| FIA                  | O'BRIEN            | 2017/18 |
| LAOISE               | O'CONNOR           | 2017/18 |
| DERMOT ANTHONY       | O'CONNOR           | 2017/18 |
| ETHAN JAMES          | O'DONNELL          | 2017/18 |

|                 |                   |         |
|-----------------|-------------------|---------|
| CORMAC GERARD   | O'DONOGHUE        | 2017/18 |
| ODIN            | O'DROMA           | 2017/18 |
| THERESE MARY    | O'DWYER           | 2017/18 |
| NIALL THOMAS    | O'HARA            | 2017/18 |
| SHANNON         | O'HARE FOX        | 2017/18 |
| DAVID           | O'KEEFFE          | 2017/18 |
| MEGAN CATHERINE | O'KELLY           | 2017/18 |
| NATHAN FRANK    | O'NEILL           | 2017/18 |
| TARA            | O'NEILL           | 2017/18 |
| MIA ALLANAH     | O'ROURKE          | 2017/18 |
| LORNA NORA MARY | O'SULLIVAN        | 2017/18 |
| NIAMH CATHERINE | O'TOOLE           | 2017/18 |
| AOIFE MAIREAD   | PADDEN            | 2017/18 |
| INA             | PEJA              | 2017/18 |
| CLIONA MARIE    | PLUNKETT          | 2017/18 |
| RACHAEL TERESA  | QUINN             | 2017/18 |
| EMILY ANN       | REGAN             | 2017/18 |
| EOIN JAMES      | REIDY             | 2017/18 |
| KILLIAN BRENDAN | REILLY            | 2017/18 |
| GRAINNE ELLEN   | REILLY            | 2017/18 |
| JADE            | RENNIX            | 2017/18 |
| CHELSEY MARY    | RICE              | 2017/18 |
| MAJELLA MARIE   | RUDDY             | 2017/18 |
| FRANCES ROSE    | RUSSELL           | 2017/18 |
| JACKSON SCOTT   | RYAN              | 2017/18 |
| JANE MARIE      | SEERY             | 2017/18 |
| MADISON HAYES   | SHEAHAN           | 2017/18 |
| AOIFE SINEAD    | SHERIDAN          | 2017/18 |
| FEARGHAIL NOEL  | SHERIDAN          | 2017/18 |
| ORNA MARY       | SLEVIN            | 2017/18 |
| GRAINNE         | SMYTH             | 2017/18 |
| PAULINA         | SOLARCZYK         | 2017/18 |
| CIARA MARGARET  | SOMMERFIELD WALSH | 2017/18 |
| DAIRE MICHAEL   | STAPLETON         | 2017/18 |
| NICOLE MARIE    | STEWART           | 2017/18 |
| HAZEL EITHNE    | STEWART BYRNE     | 2017/18 |
| DYLAN           | SWEENEY           | 2017/18 |
| MARTIN ANTHONY  | SYNAN             | 2017/18 |
| EIMEAR          | TESTER            | 2017/18 |
| CILLIAN MARTIN  | TOWNSEND          | 2017/18 |
| KILLIAN PATRICK | TULLY             | 2017/18 |
| SORCHA JO       | TUTTY             | 2017/18 |
| GARY            | VAVASOUR          | 2017/18 |
| MIGLE           | VIPARTAITE        | 2017/18 |

|              |        |         |
|--------------|--------|---------|
| ULTAN THOMAS | WALSH  | 2017/18 |
| HELEN        | WARD   | 2017/18 |
| RACHAEL      | WILSON | 2017/18 |

| First name       | Surname          | Academic Year |
|------------------|------------------|---------------|
| MEGAN            | ALDRIDGE         | 2018/19       |
| SUZANNA MARY     | BEHAN            | 2018/19       |
| DANIEL PATRICK   | BELL             | 2018/19       |
| CIARA ROSE       | BERMINGHAM       | 2018/19       |
| AVA TERESA       | BOLGER           | 2018/19       |
| MIRIAM FATIMA    | BOUDERBANE MOORE | 2018/19       |
| NICOLE           | BRADSHAW         | 2018/19       |
| RACHEL ELIZABETH | BRADY            | 2018/19       |
| AMY              | BRANNIGAN        | 2018/19       |
| CIARAN           | BRAZIL           | 2018/19       |
| SAM LUKE         | BRIGGS           | 2018/19       |
| ELIZABETH        | BROPHY           | 2018/19       |
| NICHOLAS PATRICK | BROWNE           | 2018/19       |
| AOIFE            | BUCKLEY          | 2018/19       |
| DYLAN            | BURKE            | 2018/19       |
| LAURA NIAMH      | BURKE            | 2018/19       |
| CONOR THOMAS     | BYRNE            | 2018/19       |
| LIAM OWEN        | BYRNE            | 2018/19       |
| ALICE MARGARET   | CANAVAN          | 2018/19       |
| SOPHIE RACHELLE  | CANTWELL         | 2018/19       |
| NICOLE           | CARR             | 2018/19       |
| CIARA FIONA      | CARSON           | 2018/19       |
| JULIEANN         | CARTHY           | 2018/19       |
| AISLING MARGARET | CASSIDY          | 2018/19       |
| AMY              | COEN             | 2018/19       |
| RÓISÍN ELIZABETH | CONDON           | 2018/19       |
| KATIE MAE        | CONNOLLY         | 2018/19       |
| DARRAN           | CONNOLLY         | 2018/19       |
| RACHEL JANE      | CONNOLLY         | 2018/19       |
| LAUREN SOPHIE    | COSGRAVE         | 2018/19       |
| NIAMH EMILY      | COSTELLOE        | 2018/19       |
| LEANNE           | COURTNEY         | 2018/19       |
| NIAMH MARGARET   | CRAVEN           | 2018/19       |
| ZOE THERESA      | CULLEN           | 2018/19       |
| JANE             | CUMMINS          | 2018/19       |
| ROISIN CARMEL    | DALY             | 2018/19       |
| DANIEL           | DEANE            | 2018/19       |
| REBECCA LOUISE   | DEMPSEY          | 2018/19       |
| TOIRLACH         | DEVER            | 2018/19       |

|                  |             |         |
|------------------|-------------|---------|
| NIALL BRENDAN    | DILLON      | 2018/19 |
| DANIEL ANDREW    | DOHERTY     | 2018/19 |
| EMMA             | DOHERTY     | 2018/19 |
| NICOLE           | DOHERTY     | 2018/19 |
| MICHAEL WILLIAM  | DOHERTY     | 2018/19 |
| BRIAN JOHN       | DOWLING     | 2018/19 |
| AIDEEN CIARA     | DOWNES      | 2018/19 |
| KASEY            | DOYLE       | 2018/19 |
| ROISIN CAITLEAIN | DOYLE       | 2018/19 |
| SHAUNA           | DOYLE       | 2018/19 |
| ORLA ANGELA      | DOYLE       | 2018/19 |
| LAURA            | DOYLE       | 2018/19 |
| AIDAN            | DOYLE       | 2018/19 |
| EMMA             | DOYLE       | 2018/19 |
| KEVIN JAMES      | DUNNE       | 2018/19 |
| ERIKA            | DUNNE       | 2018/19 |
| KERRIE ANN       | DUNNE       | 2018/19 |
| EMILY MARY       | DUNNEY      | 2018/19 |
| ALANNAH CLARE    | ELGAR       | 2018/19 |
| KAREN VERONICA   | ENGLISH     | 2018/19 |
| CIARAN MICHAEL   | FAHEY       | 2018/19 |
| ALAN PAUL        | FAHY        | 2018/19 |
| CATHERINE MARY   | FALLON      | 2018/19 |
| SHANE MARK       | FARRELL     | 2018/19 |
| KATIE            | FEENEY      | 2018/19 |
| REBECCA ANN      | FEENEY      | 2018/19 |
| DAIRE ALAN       | FINN        | 2018/19 |
| ROISIN           | FITZPATRICK | 2018/19 |
| BLATHNAID        | FLAHERTY    | 2018/19 |
| PADRAIG MYLES    | FOGARTY     | 2018/19 |
| CIARA ANNE       | FORSYTH     | 2018/19 |
| BRENDAN          | FOSTER      | 2018/19 |
| HEATHER ELLEN    | FOY         | 2018/19 |
| ALISON           | FULLAM      | 2018/19 |
| KERRI            | GALLAGHER   | 2018/19 |
| ANNA             | GALLAGHER   | 2018/19 |
| MEGAN TERESA     | GALLAGHER   | 2018/19 |
| CIARA            | GALVIN      | 2018/19 |
| DARRAGH LUKE     | GIBBONS     | 2018/19 |
| EOGHAN           | GOODWIN     | 2018/19 |
| CONOR            | GRANT       | 2018/19 |
| AMY CATHERINE    | GREENE      | 2018/19 |
| SYLVESTER THOMAS | GROGAN      | 2018/19 |
| ANNA ELIZABETH   | HAMILL      | 2018/19 |

|                   |                |         |
|-------------------|----------------|---------|
| NIAMH FRANCES     | HARRINGTON     | 2018/19 |
| AOIFE JULIA       | HARTE          | 2018/19 |
| NIAMH MARY        | HENRY          | 2018/19 |
| CLARA MARIE       | HERRON         | 2018/19 |
| CIAN              | HIGGINS        | 2018/19 |
| DENISE BERNADETTE | HIGGINS        | 2018/19 |
| JACK ELLIOT       | HOGAN          | 2018/19 |
| ROBERT            | HOLOHAN        | 2018/19 |
| AOIFE             | HUGHES         | 2018/19 |
| CIAN              | HUTCHINSON     | 2018/19 |
| TERENCE ANDREW    | HYLAND         | 2018/19 |
| RHIANNA           | JONES          | 2018/19 |
| SHANNON           | JOYCE          | 2018/19 |
| BRIAN JOHN        | JOYCE          | 2018/19 |
| TARA KATHLEEN     | KAVANAGH       | 2018/19 |
| ADAM PAUL         | KAVANAGH       | 2018/19 |
| LAUREN JADE       | KEELER         | 2018/19 |
| MICHAEL           | KEHOE          | 2018/19 |
| CLARE             | KELLY          | 2018/19 |
| NICOLE            | KELLY          | 2018/19 |
| KEVIN             | KELLY          | 2018/19 |
| ROSS FRANCIS      | KENNY          | 2018/19 |
| AILISH BRIDGET    | KIERNAN        | 2018/19 |
| ALEXANDER PHILLIP | KONCHAR        | 2018/19 |
| ETHAN             | LAHIFF         | 2018/19 |
| AOIFE             | LAWLESS LARKIN | 2018/19 |
| AMIE SARAH        | LAWLOR         | 2018/19 |
| NORA MARIA        | LEE            | 2018/19 |
| THOMAS MICHAEL    | LENISTON       | 2018/19 |
| CLARA ANN         | LEONARD        | 2018/19 |
| SOPHIE VERONICA   | LOWE           | 2018/19 |
| SHANE             | LYNCH          | 2018/19 |
| DARRAGH           | LYONS          | 2018/19 |
| MEGAN MAJELLA     | MAGUIRE        | 2018/19 |
| EMMA JANE         | MALONE         | 2018/19 |
| RACHEL KATE       | MALONEY        | 2018/19 |
| HANNAH PAULA      | MANGAN SMALL   | 2018/19 |
| RACHEL DIANE      | MARTIN         | 2018/19 |
| ASHLEY LAURA      | MASLIN         | 2018/19 |
| AMBER ROSE        | MASTERS        | 2018/19 |
| DAVID             | MC BRIDE       | 2018/19 |
| RYAN PATRICK      | MC CABE        | 2018/19 |
| JESSICA           | MC DONNELL     | 2018/19 |
| SINEAD CHRISTINE  | MC EVOY        | 2018/19 |



|                      |                   |         |
|----------------------|-------------------|---------|
| MICHAEL CONAL        | MC FADDEN         | 2018/19 |
| CONOR BRIAN          | MC GEE            | 2018/19 |
| SOPHIE LEIGH         | MC GEOWN          | 2018/19 |
| RACHEL               | MC GOWAN          | 2018/19 |
| AMY NICOLE           | MC GRATH          | 2018/19 |
| KARL                 | MC MENAMIN        | 2018/19 |
| AOIFE MAIRE          | MC NAMEE WHELEHAN | 2018/19 |
| DAVID JOSEPH FRANCIS | MC QUAID          | 2018/19 |
| LAUREN               | MC WEY            | 2018/19 |
| DEAN                 | MENTON            | 2018/19 |
| ANDREW               | MERRIMAN          | 2018/19 |
| CAOIMHE              | MITCHELL          | 2018/19 |
| HAZEL EVELYN         | MITCHELL          | 2018/19 |
| MANUS                | MOLLOY            | 2018/19 |
| HOLLIE               | MOORE             | 2018/19 |
| AOIFE SARAH          | MORAN             | 2018/19 |
| REBECCA CLARE        | MULLANEY          | 2018/19 |
| ROSS PATRICK         | MULLIN            | 2018/19 |
| MATTHEW PHILIP       | MULQUEEN          | 2018/19 |
| SHANE JAMES          | MURPHY            | 2018/19 |
| EIMEAR               | MURPHY            | 2018/19 |
| AISLING              | MURPHY            | 2018/19 |
| LAUREN               | MURPHY            | 2018/19 |
| TARA MARGARET        | MURPHY            | 2018/19 |
| SHANE MICHAEL        | NEEDHAM           | 2018/19 |
| CARLA LEANNE         | NÍ DHOCHARTAIGH   | 2018/19 |
| CAITRIONA            | NÍ OISTIN         | 2018/19 |
| CHLOE                | NIC GIOLLARNATH   | 2018/19 |
| MEGAN MAIREAD        | NOLAN             | 2018/19 |
| STEPHANIE            | NOLAN             | 2018/19 |
| ABBIE                | NUGENT            | 2018/19 |
| LEILA                | OAKMAN            | 2018/19 |
| REBECCA              | O'CONNOR          | 2018/19 |
| KATHERINE ELIZABETH  | O'DONNELL         | 2018/19 |
| KATIE                | O'DONNELL         | 2018/19 |
| STEPHEN JOSEPH       | O'DONOGHUE        | 2018/19 |
| EIMEAR ROSE          | O'LEARY           | 2018/19 |
| AMY                  | O'REILLY          | 2018/19 |
| MAEVE                | O'SHEA            | 2018/19 |
| CORMAC DAVID         | PALMER            | 2018/19 |
| SIOBHAN              | POWER             | 2018/19 |
| LAUREN LEE MARIE     | POWER             | 2018/19 |
| LIAM PATRICK         | POWER             | 2018/19 |
| PETER EDWARD         | PRENDERGAST       | 2018/19 |

|                      |          |         |
|----------------------|----------|---------|
| CHLOE DENISE         | RAFFERTY | 2018/19 |
| CIARAN MICHAEL       | RAFFERTY | 2018/19 |
| RONAN MATTHEW        | REDDY    | 2018/19 |
| HANNAH               | REDMOND  | 2018/19 |
| ALAN                 | REYNOLDS | 2018/19 |
| PATRICK THOMAS       | ROACHE   | 2018/19 |
| RUTH ELLEN           | ROCHFORD | 2018/19 |
| WILLIAM              | ROWE     | 2018/19 |
| SINEAD FRANCES       | RUSSELL  | 2018/19 |
| CONOR                | RYAN     | 2018/19 |
| DAIRE CHRISTOPHER    | SEERY    | 2018/19 |
| ANDREW               | SHERIDAN | 2018/19 |
| DARRAGH RICHARD      | SLATER   | 2018/19 |
| SARAH VICTORIA       | SMITH    | 2018/19 |
| AINE DAGMAR          | SMITH    | 2018/19 |
| CHRISTIAN            | SMITH    | 2018/19 |
| ELLIE ANNE           | SMITH    | 2018/19 |
| DONNCHADH            | STOBIE   | 2018/19 |
| SOPHIE               | THIESEN  | 2018/19 |
| SONAL                | THOMPSON | 2018/19 |
| HANNAH JOY           | TREACY   | 2018/19 |
| JENNIE               | TULLY    | 2018/19 |
| SHAUNA               | WALL     | 2018/19 |
| TERVINE              | WALLACE  | 2018/19 |
| ANNA                 | WALSH    | 2018/19 |
| CHRISTINA BERNADETTE | WALSH    | 2018/19 |
| ELLA                 | WHELAN   | 2018/19 |
