# Supplementary material for: Geo-locate Project: A novel approach to resolving meteorological station location issues with the assistance of undergraduate students
Source: Copernicus journal article supplement (doi:10.5194/gc-2019-10), 2019-07-02
Supplement: Supplementary file 2 [file gc-2019-10-supplement.zip]

## GY202 Continuous Assessment Feedback on GEOLOCATE project

**Q1. Please indicate the extent to which you agree or disagree with each of the following statements. Please tick the box that represents your level of agreement.**

|                                                                                                               | Strongly Agree | Agree | Neither Agree nor Disagree | Disagree | Strongly Disagree |
|---------------------------------------------------------------------------------------------------------------|----------------|-------|----------------------------|----------|-------------------|
| a). I found the assignment provided insights into some of the issues with data                                |                |       |                            |          |                   |
| b). Supports provided were sufficient to aid completion of the assignment                                     |                |       |                            |          |                   |
| c). The steps and guidance given were clear and easy to follow                                                |                |       |                            |          |                   |
| d). The assignment provided me with an insight into the power of citizen science                              |                |       |                            |          |                   |
| e). I would prefer to participate in assignments like this over other, more traditional, types of assignments |                |       |                            |          |                   |
| f). The work load was appropriate to the level of credit given                                                |                |       |                            |          |                   |
| g). Overall I found the assignment to be a valuable learning experience                                       |                |       |                            |          |                   |
| h). I was more motivated than is usual for me in doing this assignment                                        |                |       |                            |          |                   |
| i). I feel that I have made a worthwhile contribution to an important global project.                         |                |       |                            |          |                   |
| jj). I think next year's students would be happy if a similar assignment were run again                       |                |       |                            |          |                   |
| k). I think that I gained useful transferrable skills from this assignment                                    |                |       |                            |          |                   |

**Q2. For each of the items listed below please give a score from 1 to 10, indicating how important it was in enabling you to successfully complete the assignment. 1 is not important and 10 is very important.**

[illegible]

**Q3. Please indicate three aspects of this assignment that worked well.**

i).\_\_\_\_\_

ii).\_\_\_\_\_

iii).\_\_\_\_\_

**Q4. Please indicate three aspects of this assignment that could be improved.**

i).\_\_\_\_\_

ii).\_\_\_\_\_

iii).\_\_\_\_\_

**Q5. Please add any other thoughts/comments you have about the CA (good or bad) below.**

|  |
|--|
|  |
|--|
